# Supplementary material
Source: PubMed Central journal article supplement (PMC11028459)
Supplement: 262_2015_1698_MOESM1_ESM.pdf [file 262_2015_1698_MOESM1_ESM.pdf]

# Suppl. Fig. 1

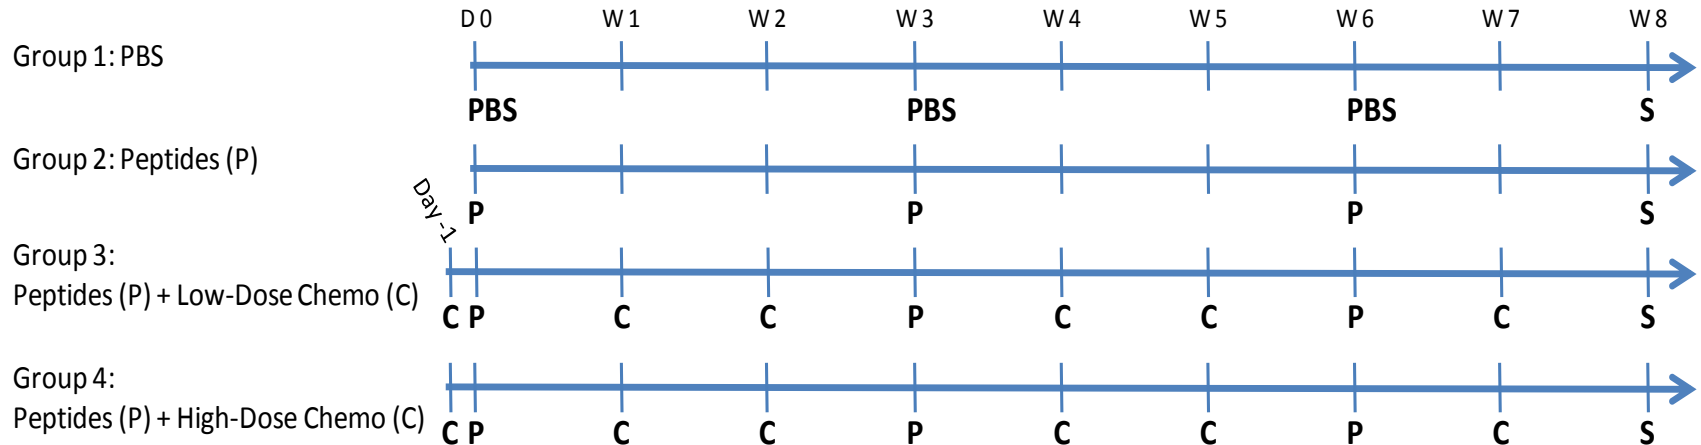

**Peptides:** 1 hTERT + 1 HCV core + 1 HCV NS3 H2<sup>b</sup>-restricted 20ug/each

**LD Chemo:** CTX 120ug; PTX 50ug; DTX 10ug

**HD Chemo:** CTX 240ug; PTX 100ug; DTX 20ug

**Suppl. Fig. 1** Immunization protocol combining the multi-peptide vaccine with weekly low- and high-dose metronomic chemotherapy in C57BL/6 mice.

Suppl. Fig. 2

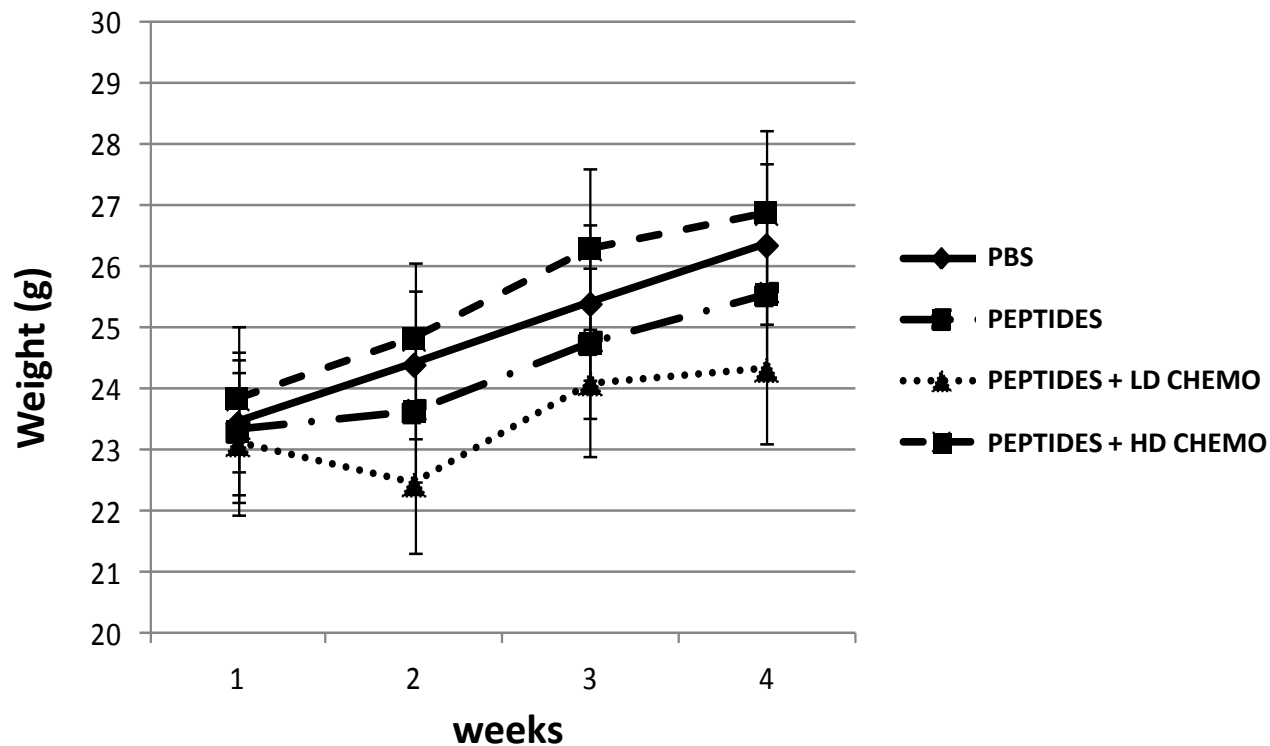

| Exp. Groups                | Average Weight variation |
|----------------------------|--------------------------|
| PBS                        | + 12,46%                 |
| PEPTIDES                   | + 9,57%                  |
| PEPTIDES + LD CHEMOTHERAPY | + 5,32 %                 |
| PEPTIDES + HD CHEMOTHERAPY | + 12,71 %                |

**Suppl. Fig. 2** Evaluation of weight for each animal in each experimental group along the whole protocol with weekly low- and high-dose metronomic chemotherapy.

## Suppl. Fig. 3

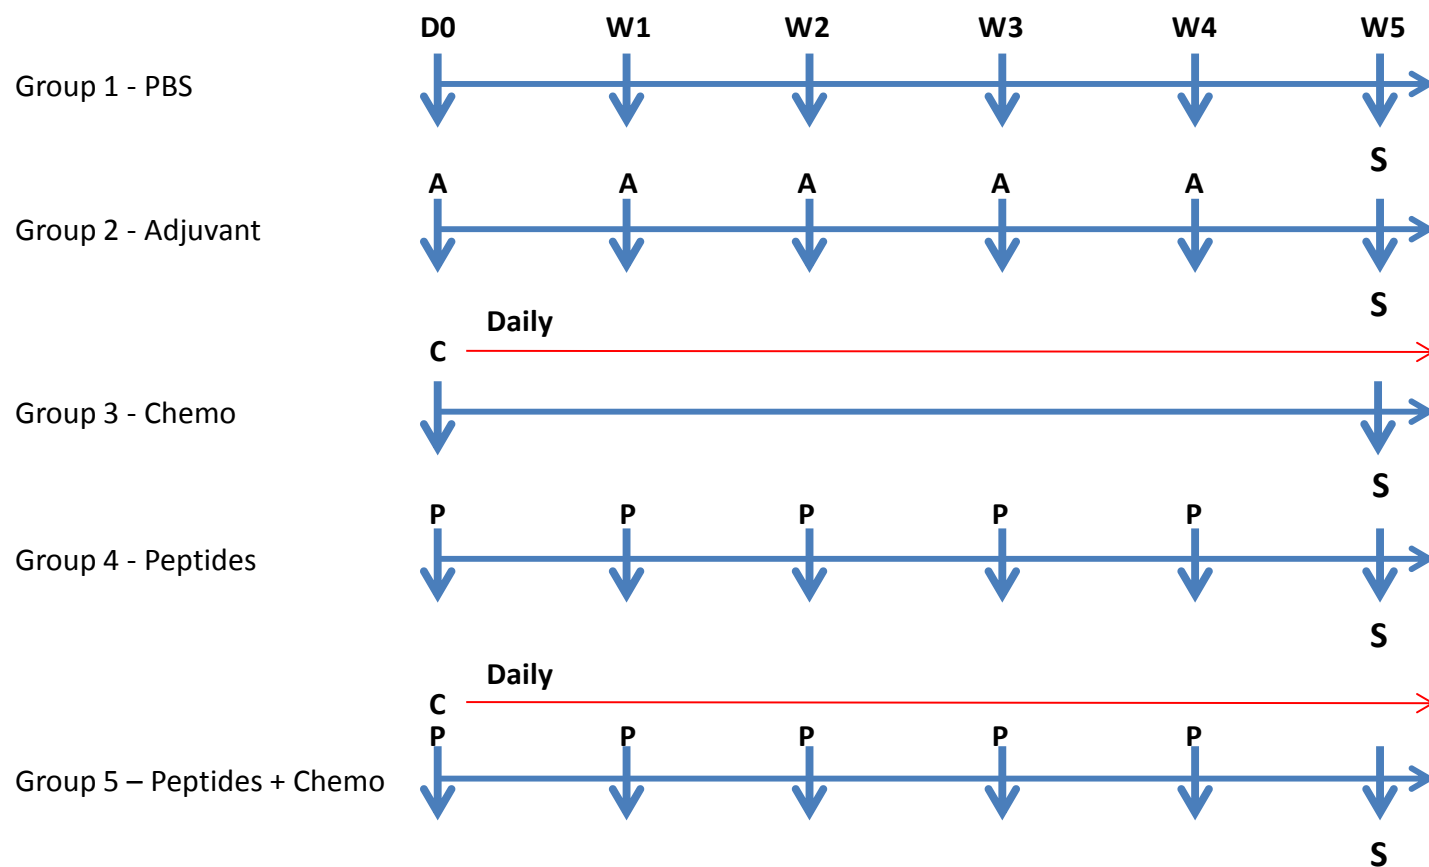

**Peptides:** 1 hTERT + 1 HCV core + 1 HCV NS3 H2<sup>b</sup>-restricted 20ug/each

**Chemo:** CTX 240ug; PTX 100ug; DTX 20ug

**Adjuvant:** Montanide+ CpG

**Suppl. Fig. 3** Immunization protocol combining the multi-peptide vaccine with daily metronomic chemotherapy in C57BL/6 mice.

Suppl. Fig. 4

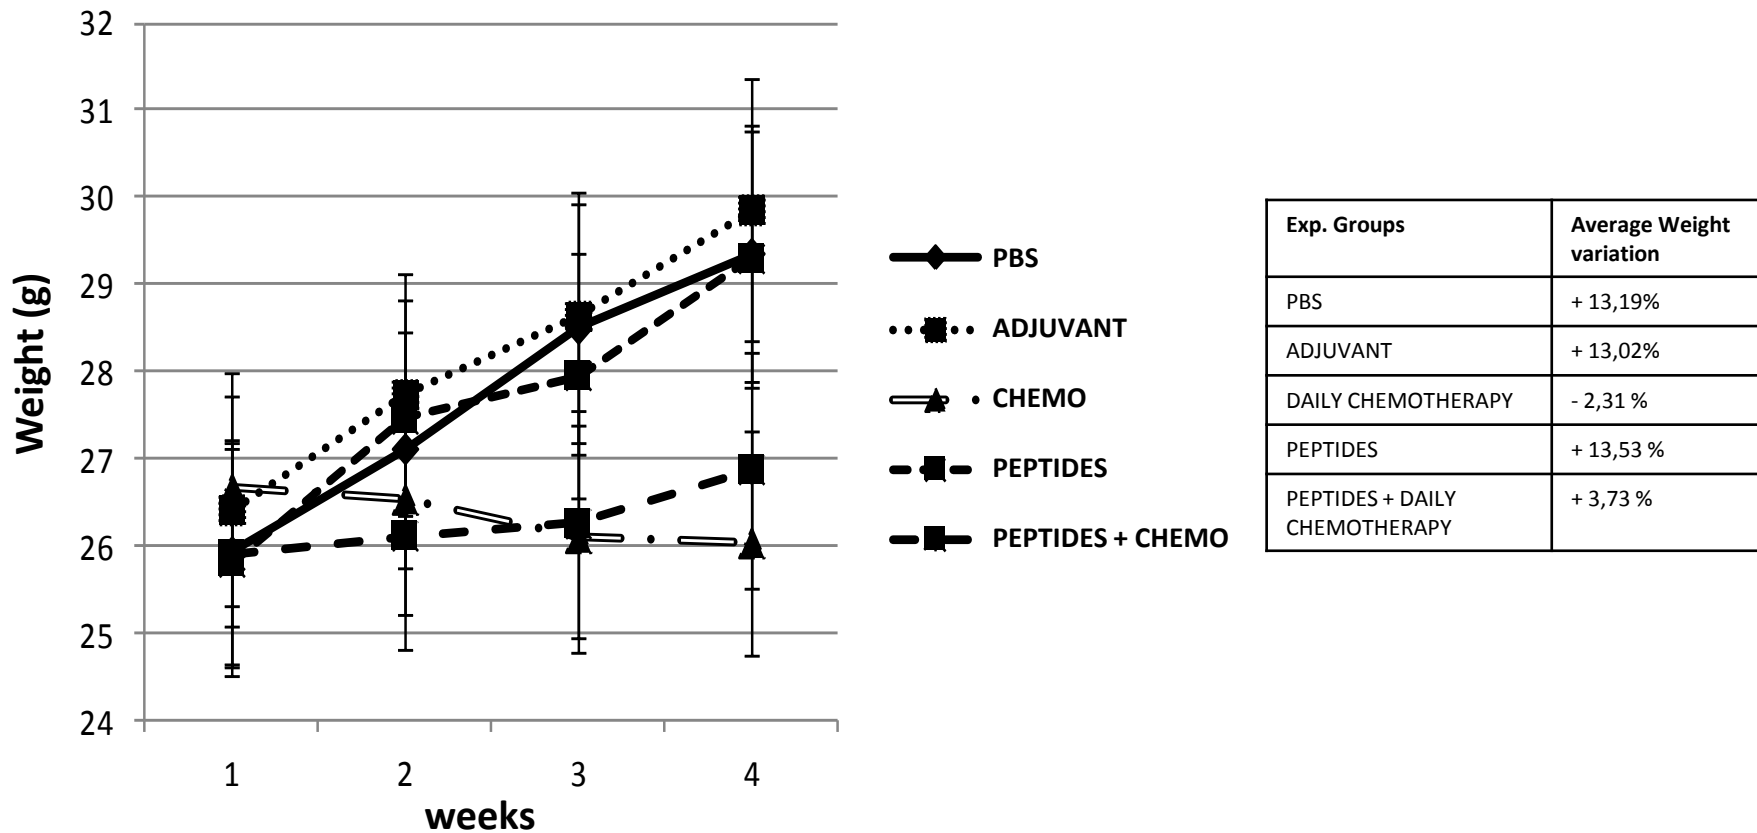

**Suppl. Fig. 4** Evaluation of weight for each animal in each experimental group along the whole protocol with daily metronomic chemotherapy.

# Suppl. Fig. 5

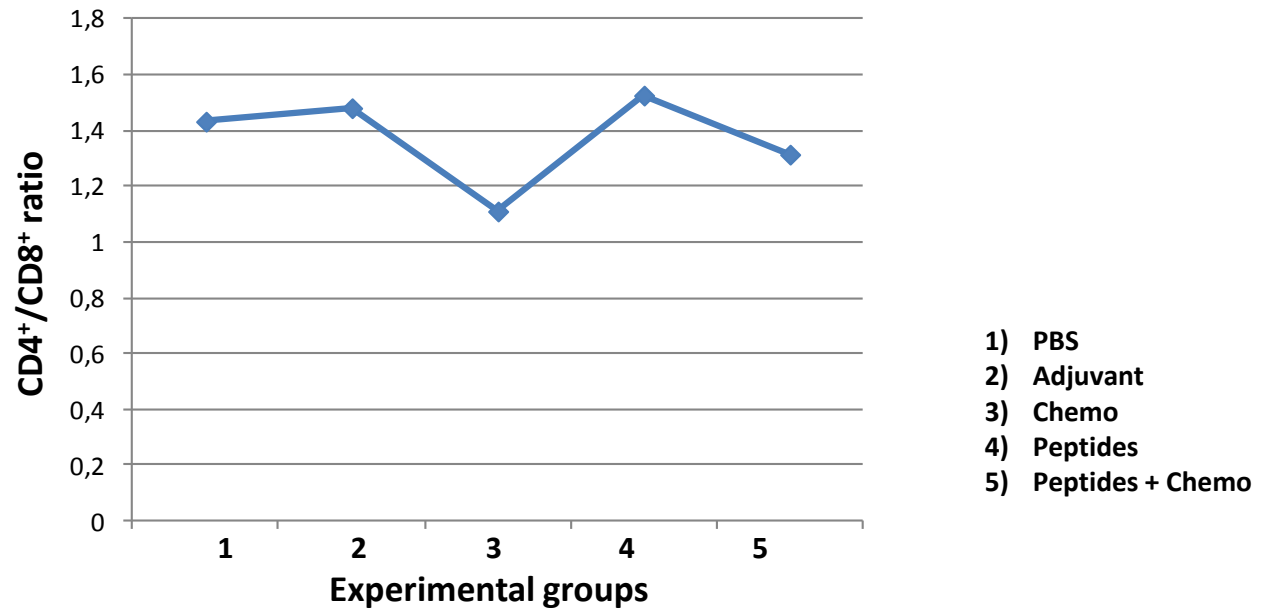

**Suppl. Fig. 5** Evaluation of the CD4+/CD8+ ratio in the different experimental groups.
